# Supplementary material for: The selectivity of water-based pyrophosphate recognition is tuned by metal substitution in dimetallic receptors
Source: Royal Society of Chemistry journal article supplement (doi:10.1039/c5dt00729a), 2015-01-01
Supplement: c5dt00729a1.pdf [file c5dt00729a1.pdf]

Supporting Information for

**The Selectivity of Water-based Pyrophosphate Recognition is Tuned by Metal Substitution in Dimetallic Receptors**

Simon Svane, Frank Kjeldsen, Vickie McKee, and Christine J. McKenzie

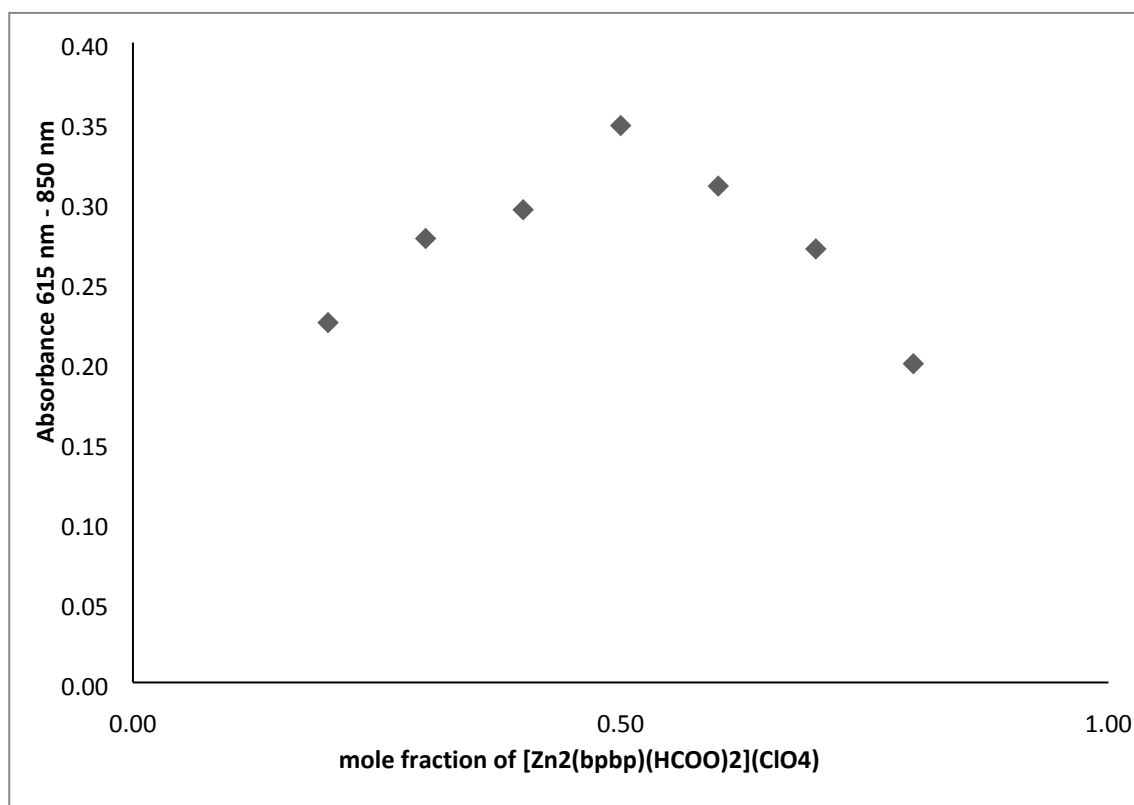

Figure S1. Job plot of 50  $\mu\text{M}$   $[\text{Zn}_2(\text{bpbp})(\text{HCOO})_2](\text{ClO}_4)$  with pyrocatechol violet.

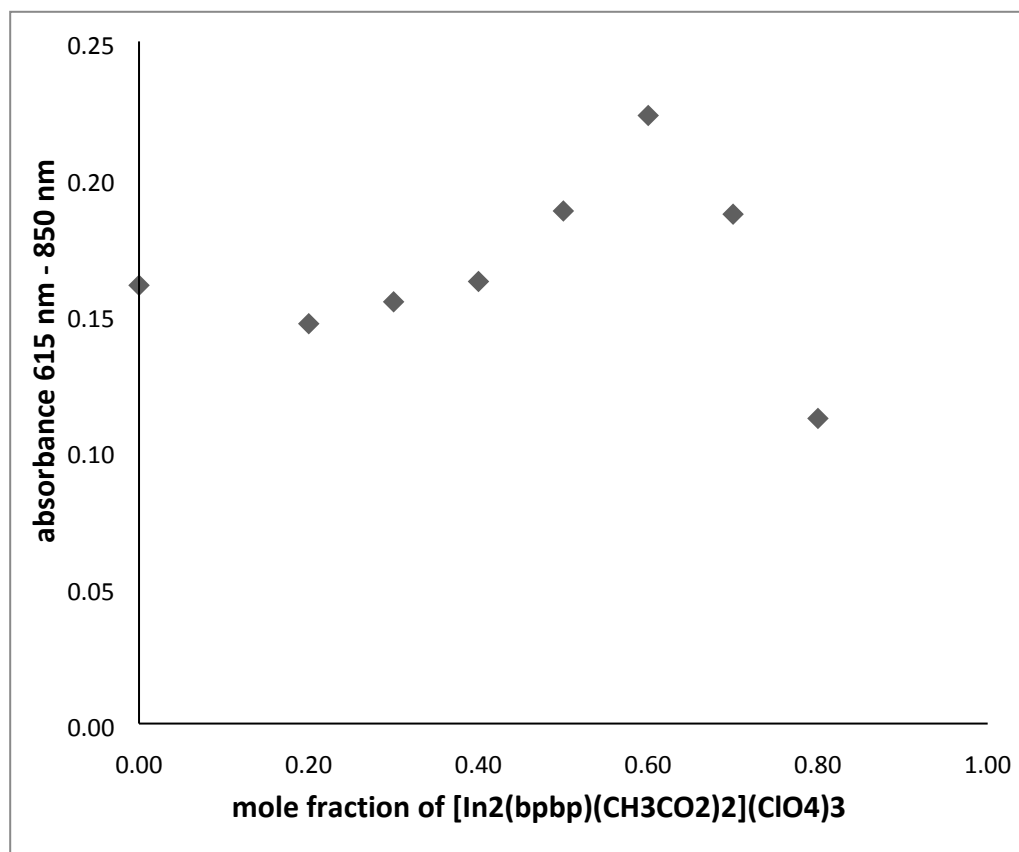

Figure S2. Job plot of 50  $\mu\text{M}$   $[\text{In}_2(\text{bpbp})(\text{CH}_3\text{CO}_2)_2](\text{ClO}_4)_3$  with pyrocatechol violet.

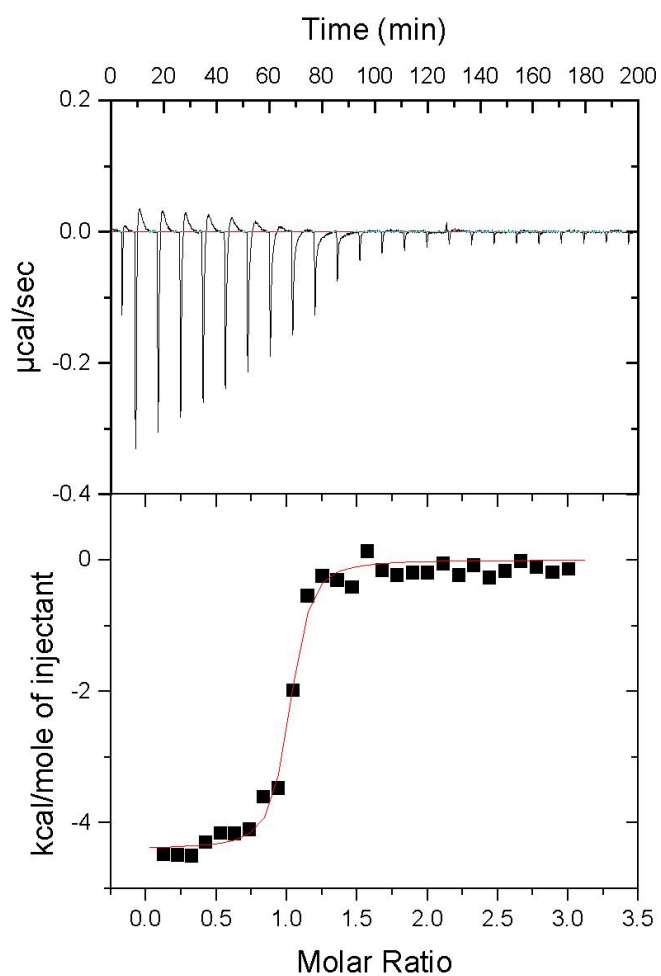

Figure S3. Binding isotherm for titration of 0.32 mM  $\text{Na}_4\text{P}_2\text{O}_7$  into 0.017 mM  $[\text{Ga}_2(\text{bpbp})(\text{OH})_2(\text{OH}_2)_2](\text{ClO}_4)_3$

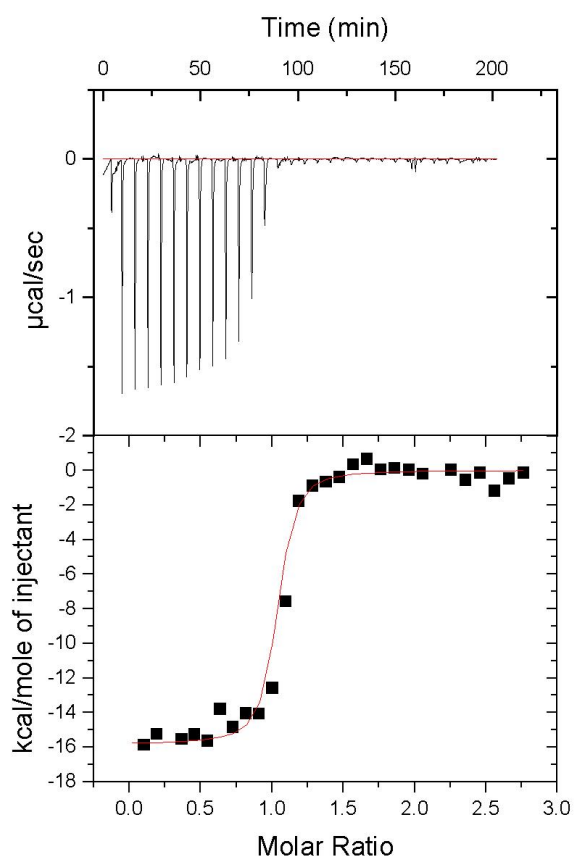

Figure S4. Binding isotherm for titration of 0.339 mM  $\text{Na}_4\text{P}_2\text{O}_7$  into 0.025 mM  $[\text{Zn}_2(\text{bpbp})(\text{HCO}_2)_2](\text{ClO}_4)$

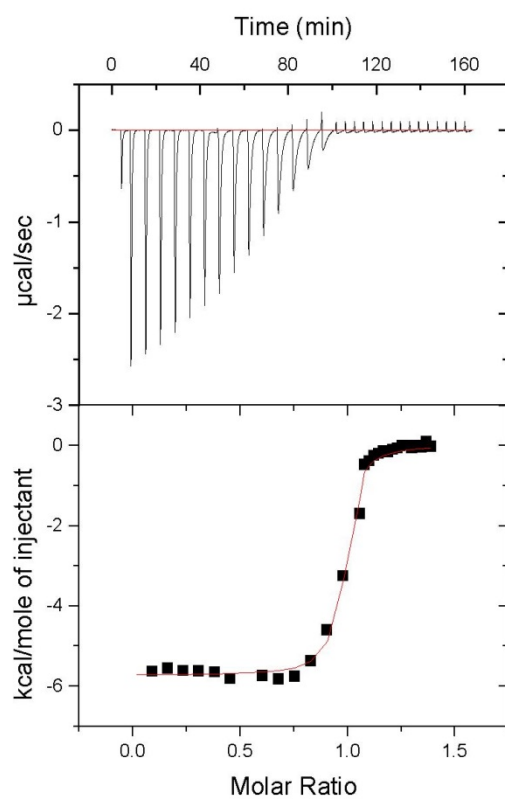

Figure S5. ITC binding isotherm for titration of 0.21 mM  $[\text{Ga}_2(\text{bpbp})(\text{OH})_2(\text{H}_2\text{O})_2](\text{ClO}_4)_3$  with 2.47 mM  $\text{Na}_2\text{HPO}_4$  in 10 mM HEPES.

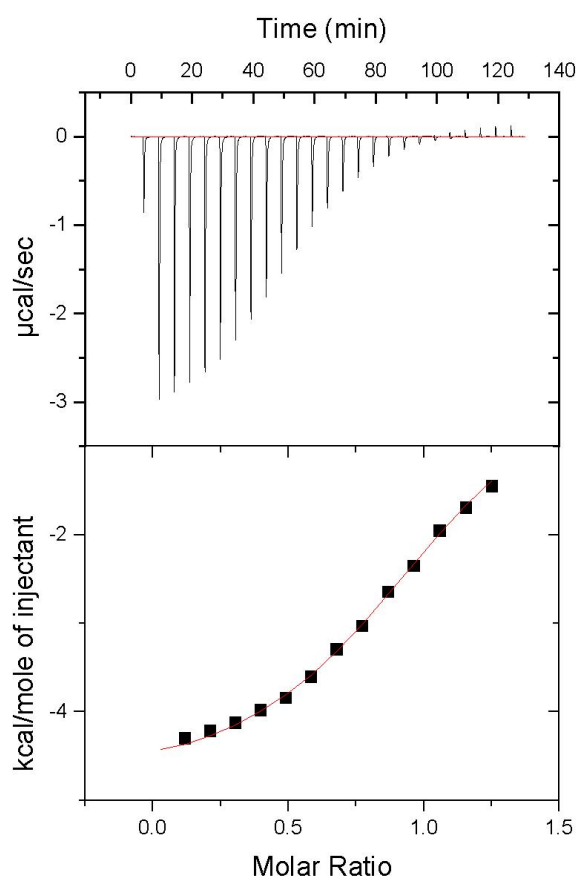

Figure S6. ITC binding isotherm for titration of 0.12 mM  $[\text{Zn}_2(\text{bpbp})(\text{HCO}_2)_2](\text{ClO}_4)$  with 2.47 mM  $\text{Na}_2\text{HPO}_4$  in 10 mM HEPES.

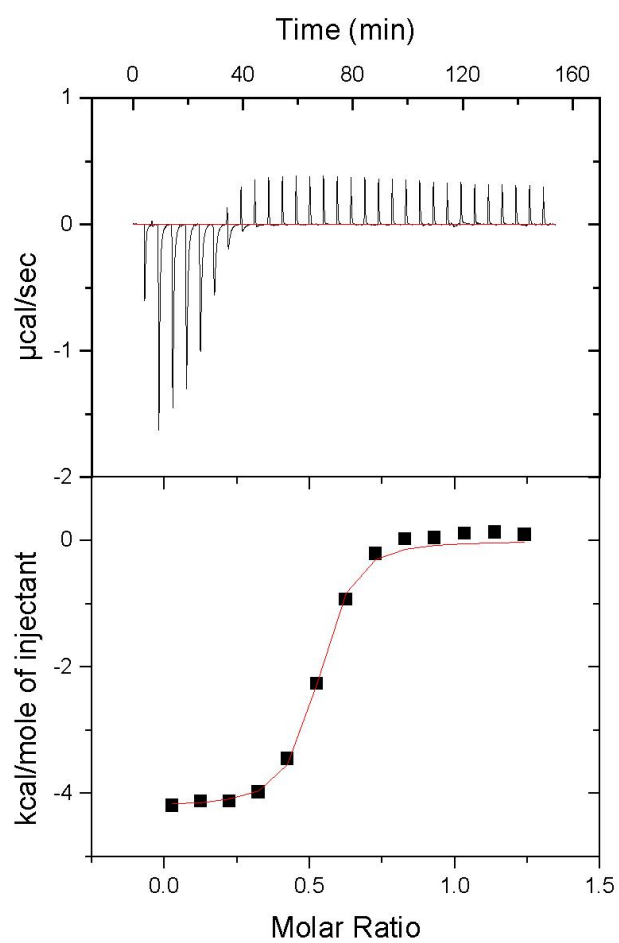

Figure S7. ITC binding isotherm for titration of 0.13 mM  $[\text{In}_2(\text{bpbp})(\text{CH}_3\text{CO}_2)_2](\text{ClO}_4)_3$  with 2.47 mM  $\text{Na}_2\text{HPO}_4$  in 10 mM HEPES.

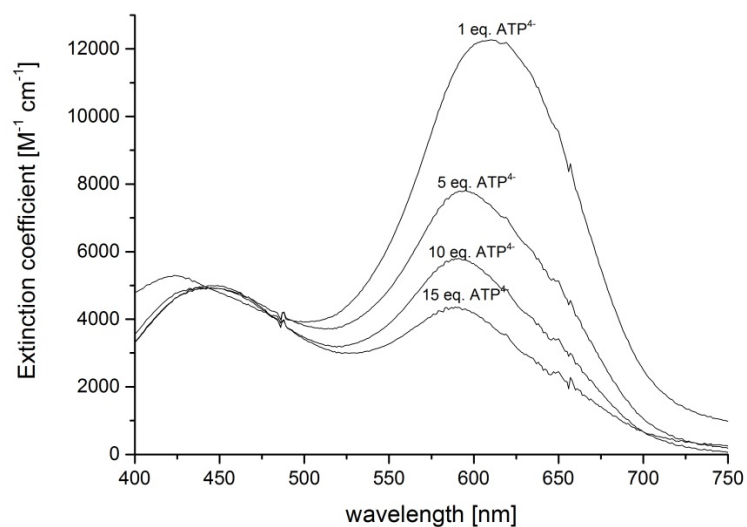

**Figure S8.** Uv-vis of 25  $\mu\text{M}$   $\{\text{Ga}_2(\text{bpbp})(\text{H}_n\text{PV})\}^{1+n+}$  in 10 mM HEPES, pH 7.2 with 1 eq., 5 eq., 10 eq. or 15 eq.  $\text{ATP}^{4-}$  after 8 h at 25°C.

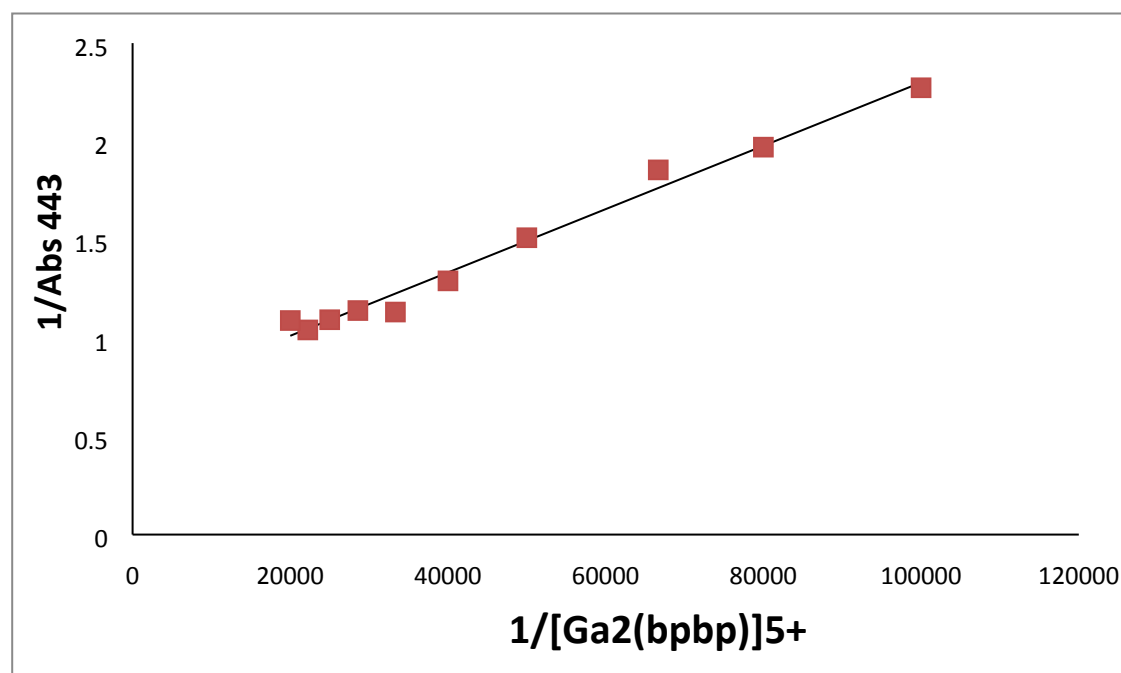

**Figure S9.** Benesi-Hildebrand plot of  $[\text{Ga}_2(\text{bpbp})(\text{OH})_2(\text{H}_2\text{O})_2](\text{ClO}_4)_3$  titrated into 50  $\mu\text{M}$  PV and linear fit for calculation  $K_a$ . Equation and  $R^2$  value is displayed in plot.



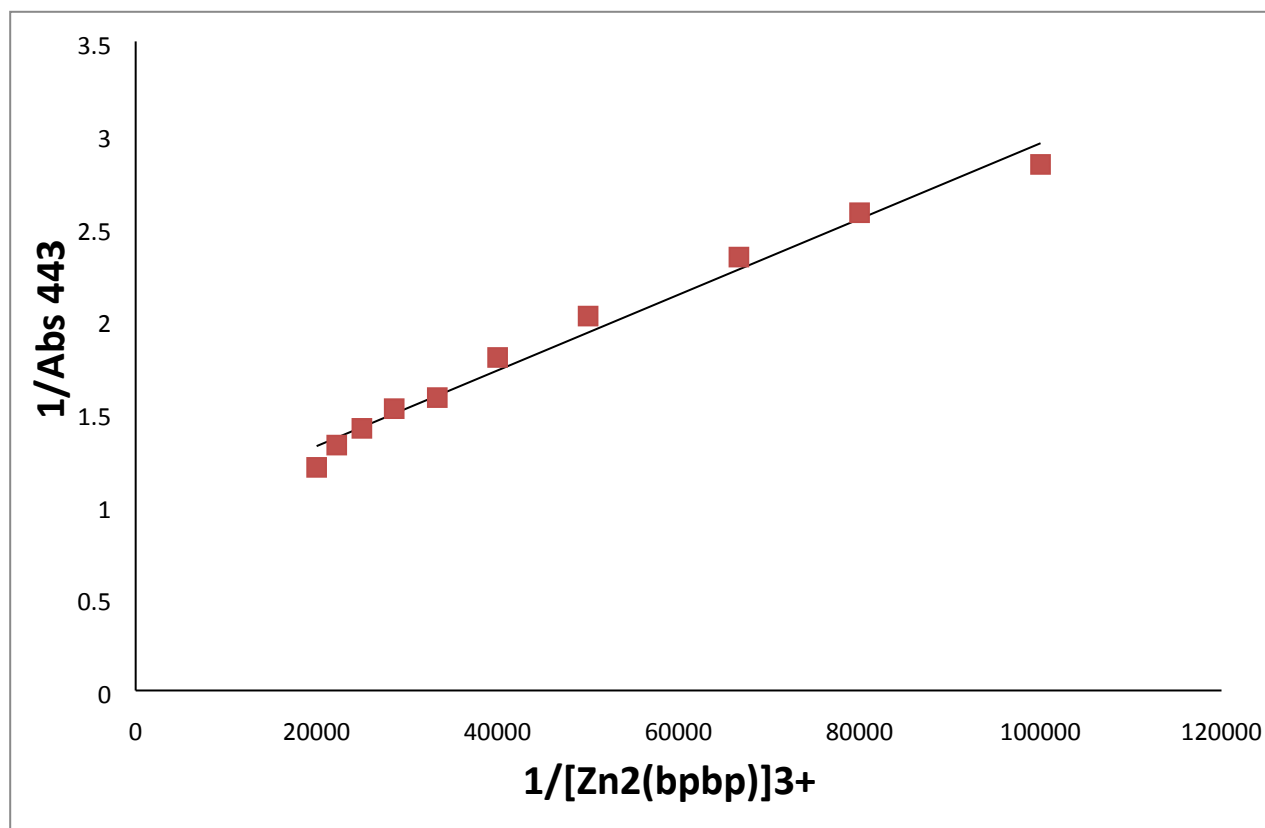

**Figure S10.** Benesi-Hildebrand plot of  $[\text{Zn}_2(\text{bpbp})(\text{HCO}_2)_2](\text{ClO}_4)$  titrated into 50  $\mu\text{M}$  PV and linear fit for calculation  $K_a$ . Equation and  $R^2$  value is displayed in plot.
